# Supplementary material
Source: publisher figshare collection journal article supplement (https://tandf.figshare.com/ndownloader/files/18733334)
Supplement: Supplementary file 1 [file 18733334]

**Supplementary file to accompany Cooper, Reay, Ireland and Norman.** Cretaceous molybdenite in metasomatic epidosite associated with the Pounamu ophiolite, New Zealand.

**Analytical methods**

Whole-rock samples were crushed in a WC ring mill. The XRF (x-ray fluorescence) major element analysis of the quartzofeldspathic schist was detemined by Richard Price at La Trobe University, Melbourne, Australia and the geochemistry and analytical precision were reported in Cooper et al. (2018). For the epidosites, major and trace element analyses for all samples reported in Table 1 were determined by ALS Geochemistry, Brisbane using the method codes ME-XRF26 (Major rock forming elements by lithium borate fusion and x-ray fluorescence analysis), ME-MS81 (Trace elements by fused bead, acid digestion and ICP-MS (inductively coupled plasma mass spectrometry) analysis) and ME4ACD81 (Highly refractory trace elements by four acid digestion and ICP-AES (inductively coupled plasma atomic emission spectroscopy) analysis). Reference materials used as standards were OGGeo 08, OREAS 120 and OREAS 100a. ALS Geochemistry, Brisbane detection limits are reported in Table 1.

The Mt Inframeta molybdenite was dated by Re-Os isotopic methods at the Research School of Earth Sciences (RSES), Australian National University using techniques described by Armistead et al. (2017, Appendix D). Mineral grains were spiked with precisely calibrated enriched 185Re and Os solutions and dissolved in reverse aqua regia to oxidise Os and to equilibrate sample and spike. Volatile OsO4 was then sparged into a Thermo Fisher Scientific Neptune MC (multicollector)-ICPMS using a flow of argon. 185Re,  186Os,  187Os,  188Os,  189Os,  190Os, and 192Os were collected and analysed simultaneously. Samples of the HLP-5 reference molybdenite were analysed at the same time as the Inframeta sample and gave results that correlate well with the RSES laboratory long-term average age for this molybdenite (220.5 Ma), and with previously published analyses (221.4 ± 5.6 Ma, Du et al. 2004). All results are reported in Table 2.

**References**

Armistead SE, Skirrow RG, Fraser GL, Huston DL, Champion DC, Norman MD. 2017. Gold and intrusion-related Mo-W mineral systems in the southern Thomson Orogen, New South Wales. Record 2017/05, Geoscience Australia, Canberra. doi:10.11636/Record.2017.005.

Cooper AF, Price RC, Reay A. 2018. Geochemistry and origin of a Mesozoic ophiolite: the Pounamu Ultramafics, Westland, New Zealand. New Zealand Journal of Geology and Geophysics. 61:444–460. doi:10.1080/00288306.2018.1494005.
